# Supplementary material for: Naja atra Cardiotoxin 1 Induces the FasL/Fas Death Pathway in Human Leukemia Cells
Source: MDPI journal article supplement (doi:10.3390/cells10082073), 2021-08-12
Supplement: s1 [file s1]

Supplementary Table S1. Primers used for qRT-PCR.

| Gene            | Nucleotide sequence               |
|-----------------|-----------------------------------|
| Fas (forward)   | 5'-CTCCTACCTCTGGTTCTTACGTCT-3'    |
| Fas (reverse)   | 5'-GAGCCCCAGCCTTCTCCATG -3'       |
| FasL (forward)  | 5'- CTCCGAGAGTCTACCAGCCAGATG -3'  |
| FasL (reverse)  | 5'- GAGTTGGACTTGCCTGTTAAATGGG -3' |
| GAPDH (forward) | 5'-GAAATCCCATCACCATCTTCCAGG-3'    |
| GAPDH (reverse) | 5'-GAGCCCCAGCCTTCTCCATG-3'        |
